# Supplementary material for: Sensitive and label-free fluorescence detection of apurinic/apyrimidinic endonuclease 1 activity based on isothermal amplified-generation of G-quadruplex
Source: Royal Society of Chemistry journal article supplement (doi:10.1039/c6nj03477b), 2017-01-01
Supplement: c6nj03477b1.pdf [file c6nj03477b1.pdf]

## **Electronic Supplementary Information (ESI)**

### **Sensitive and label-free fluorescent detection of apurinic/apyrimidinic endonuclease 1 activity based on isothermal amplified-generation of G-quadruplex**

Yufeng Huang, Yefei Ma, Yina Li, Mei Xiong, Xuejun Li, Liangliang Zhang\* and  
Shulin Zhao

*State Key Laboratory for the Chemistry and Molecular Engineering of Medicinal  
Resources, School of Chemistry and Pharmaceutical Sciences, Guangxi Normal  
University, Guilin 541004, PR China*

## Experimental

### 1. Reagents

Klenow fragment (KF) polymerase ( $3' \rightarrow 5'$  exo<sup>-</sup>), apurinic/apyrimidinic endonuclease 1 (APE1), deoxyribonucleoside triphosphates (dNTPs), Nt.BbvCI endonuclease (Nt.BbvCI), Dam methyltransferase (Dam MTase), M.SssI methyltransferase (M.SssI), uracil-DNA glycosylase (UDG) and 10×NEB buffer 4 were purchased from New England Biolabs, Ltd. (NEB, Beijing, China). HPLC-purified DNA oligonucleotides, DNA maker, bovine serum albumin (BSA), and ethidium bromide (EB) were obtained by Sangon Biotechnology Co. Ltd. (Shanghai, China). The sequences of DNA probes employed in this work were shown in Table S1. N-Methyl mesoporphyrin IX (NMM) was bought from J&K Scientific Ltd. (Beijing, China). All other reagents used in this work were of analytical grade. Water was purified by a Milli-Q plus 185 equip from Millipore (Bedford, MA, USA) and used throughout the work.

The storage concentration of APE1 obtained from NEB was  $10 \text{ U } \mu\text{L}^{-1}$  ( $1 \text{ U mL}^{-1} \approx 32.9 \text{ pM}$ , the molecular weight is 35554 Daltons). According to NEB's definition, one unit is defined as the amount of APE1 required to cleave 20 pmol of a 34 mer oligonucleotide duplex containing a single AP site in a total reaction volume of  $10 \mu\text{L}$  in 1 hour at  $37^\circ\text{C}$ .

### 2. Detection of APE1 activity

AP site-contained HP was first heated at  $95^\circ\text{C}$  for 10 min and allowed to cool naturally to room temperature. After that, a volume of  $100 \mu\text{L}$  mixture containing 100

nM HP, 1×NEB buffer 4 (20 mM Tris-acetate, pH 7.9, 50 mM potassium acetate, 10 mM magnesium acetate and 1 mM dithiothreitol), 5 U KF polymerase, 10 U Nt.BbvCI endonuclease, 100 µM dNTPs, 0.5 µM NMM and various concentrations of APE1 was incubated at 37 °C for 90 min. The fluorescence spectra were then measured by using a Cary Eclipse fluorescence spectrophotometer (Agilent, USA) at the excitation wavelength of 399 nm. The spectra were recorded in the range from 570 to 650 nm. Slit widths for the excitation and emission were both set at 10 nm. The fluorescence emission intensity was recorded at 610 nm.

### **3. Gel electrophoresis analysis**

In the gel electrophoresis assay, 12 µL of samples were loaded into the notches of the freshly prepared agarose gel (4 %), and electrophoresis was performed at 100 V for 90 min in 1× TBE buffer (90 mM Tris, 90 mM boric acid, 10 mM EDTA, pH 8.3). After staining with ethidium bromide, the electrophoresis image was taken by a digital camera under UV light.

## Supplementary Tables

**Table S1** Sequences of oligonucleotides used in this work.

| Probes                                                              | Sequences                                                                               |
|---------------------------------------------------------------------|-----------------------------------------------------------------------------------------|
| HP                                                                  | ACGATGCTAAACCCTXAGACTGCACCCAAAACCCAAAAC<br>CCAAAACCCGCTGAGGTGCAGTCTAAGGGTTTAGCATCG<br>T |
| GP                                                                  | TCAGCGGGTTTTGGGTTTTGGGTTTTGGGTGCAGTCT                                                   |
| X in HP is tetrahydrofuran modification, which is a AP site analog. |                                                                                         |

**Table S2** The comparison of this method with other reported approaches for the detection of APE1.

| Methods                                                                                                                    | Modification                                                            | Time      | Linear range                 | LOD                                                                 | Ref.      |
|----------------------------------------------------------------------------------------------------------------------------|-------------------------------------------------------------------------|-----------|------------------------------|---------------------------------------------------------------------|-----------|
| Nickel hexacyanoferrates nanoparticle-decorated Au nanochains and alkaline phosphatase amplified electrochemical detection | Complicated surface modification with nanomaterial, enzyme and antibody | >12 h     | 0.01~100 pg mL <sup>-1</sup> | 3.9 fg mL <sup>-1</sup>                                             | 1         |
| Ionic liquid doped Au nanoparticle/ graphene and alkaline phosphatase amplified electrochemical detection                  | Complicated surface modification with nanomaterial, enzyme and antibody | >8 h      | 0.1~80 pg mL <sup>-1</sup>   | 0.04 pg mL <sup>-1</sup>                                            | 2         |
| On-bead fluorescent DNA nanoprobe                                                                                          | Dual-modification with Cy3 and biotin in DNA substrate                  | > 120 min | 0.10~5.0 U                   | 0.02 U                                                              | 3         |
| Unimolecular chemically modified DNA probe                                                                                 | Dual-modification with ROX and BHQ <sub>2</sub> in DNA substrate        | ~20 min   | 0.10~5.0 U mL <sup>-1</sup>  | 0.1 U mL <sup>-1</sup>                                              | 4         |
| Double-stranded DNA based fluorescent probe                                                                                | Dual-modification with TAMRA and DABYCL in DNA substrate                | ~9 min    | 0.024~2.0 U mL <sup>-1</sup> | 0.024 U mL <sup>-1</sup>                                            | 5         |
| Label-free detection based on isothermal amplified-generation of G-quadruplex                                              | Label-free without modification                                         | 90 min    | 0.01~1.0 U mL <sup>-1</sup>  | 0.006 U mL <sup>-1</sup><br>(0.197 pM,<br>7.0 pg mL <sup>-1</sup> ) | This work |

1. J. Han, Y. Zhuo, Y. Chai, Y. Xiang, R. Yuan, Y. Yuan, N. Liao, *Biosens. Bioelectron.*, 2013, 42, 116-122.
2. Z. Zhong, M. Li, Y. Qing, N. Dai, W. Guan, W. Liang, D. Wang, *Analyst*, 2014, 139, 6563-6568.

3. G. Gines, C. Saint-Pierre and D. Gasparutto, *Anal. Chim. Acta*, 2014, 812, 168-175
4. S. Fang, L. Chen and M. Zhao, *Anal. Chem.*, 2015, 87, 11952-11956.
5. B. Liu and L. Peng, *Anal. Methods*, 2016, 4, 862-868.

## Supplementary Figures

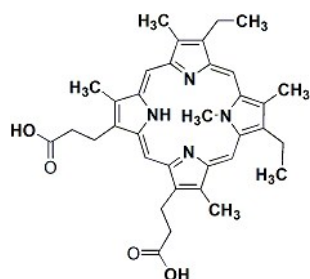

**Fig. S1** The molecular structure of NMM.

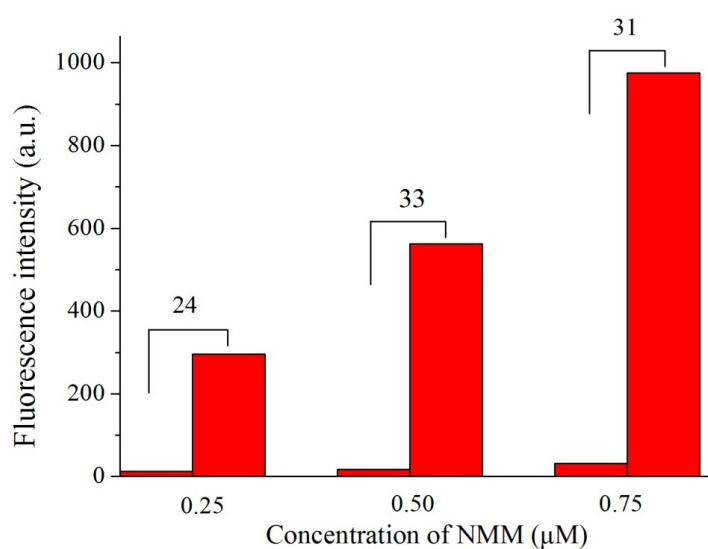

**Fig. S2** Signal-to-background ratio at different concentrations of NMM. The concentrations of HP, dNTPs, KF, Nt.BbvCI and APE1 were 100 nM, 100 μM, 5.0 U, 10.0 U and 20 U mL<sup>-1</sup>, respectively.

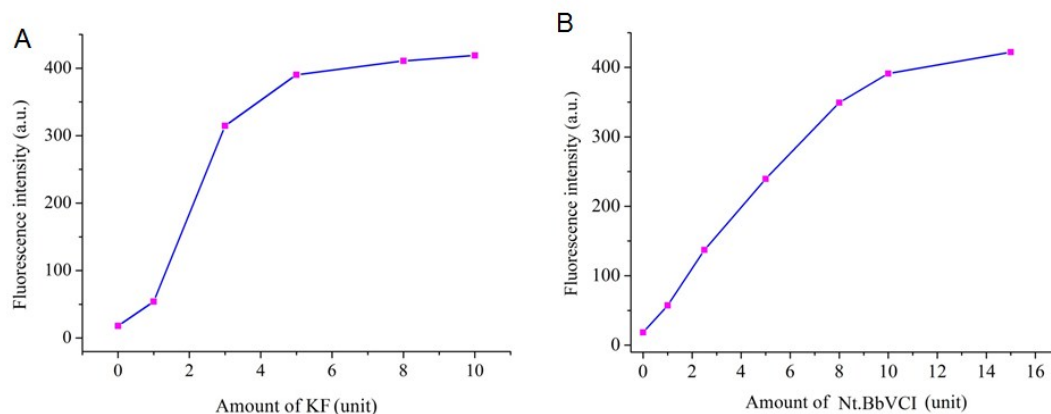

**Fig. S3** (A) The effect of the KF polymerase amounts on the assay. The concentrations of HP, dNTPs, Nt.BbvCI and APE1 were 100 nM, 100  $\mu$ M, 10.0 U and 1 U mL<sup>-1</sup>, respectively. (B) The effect of the Nt.BbvCI endonuclease amounts on the assay. The concentrations of HP, dNTPs, KF and APE1 were 100 nM, 100  $\mu$ M, 5.0 U and 1 U mL<sup>-1</sup>, respectively.

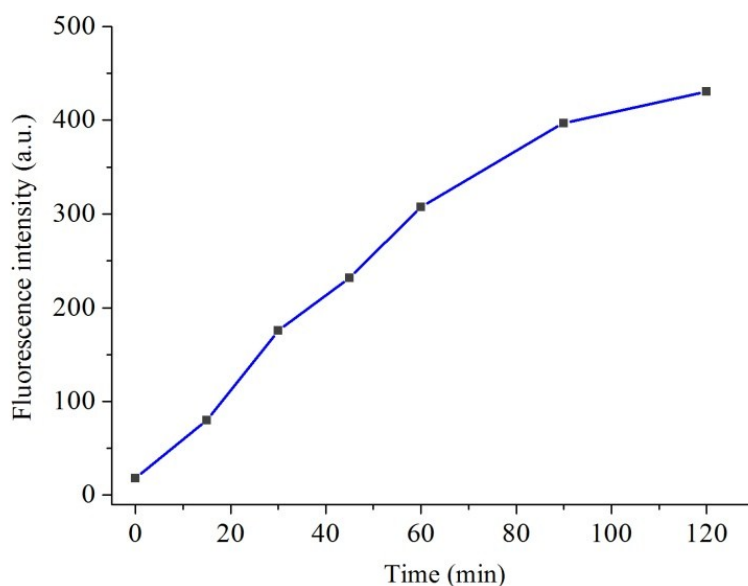

**Fig. S4** Optimization of the reaction time. The concentrations of HP, dNTPs, KF, Nt.BbvCI, NMM and APE1 were 100 nM, 100  $\mu$ M, 5.0 U, 10.0 U, 0.5  $\mu$ M and 1 U mL<sup>-1</sup>.

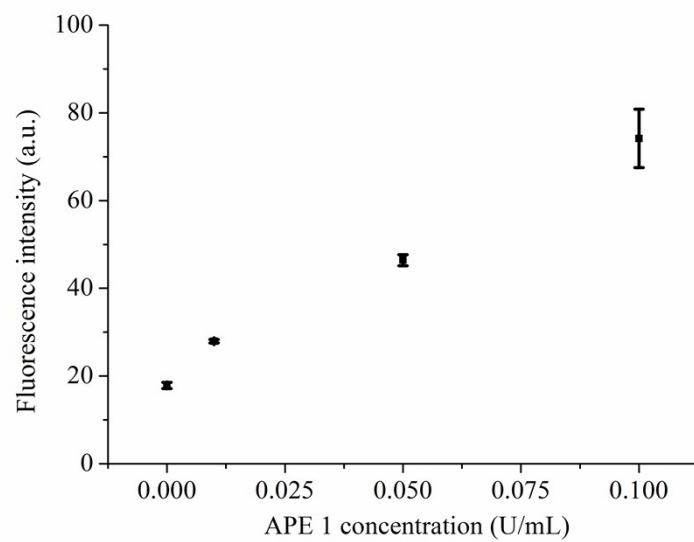

**Fig. S5** The relationship between fluorescence intensity and APE1 concentration at low concentration range. Error bars were estimated from three replicate measurements.
